# Supplementary material for: Improving protein content and quality by over-expressing artificially synthetic fusion proteins with high lysine and threonine constituent in rice plants
Source: PubMed Central journal article supplement (PMC5039639; doi:10.1038/srep34427), 2016-09-28
Supplement: srep34427-s1.pdf [file srep34427-s1.pdf]

# **Improving protein content and quality by over-expressing artificially synthetic fusion proteins with high lysine and threonine constituent in rice plants**

Shu-Ye Jiang, Ali Ma, Lifen Xie and Srinivasan Ramachandran\*

Rice Functional Genomics Group, Temasek Life Sciences Laboratory, 1 Research Link, National University of Singapore, Singapore 117604

**\*Corresponding author:** Srinivasan Ramachandran (sri@tll.org.sg)

## **Supplementary information**

**Supplementary Figure S1.** Prediction of secondary structures of proteins encoded by two newly synthetic genes

**Supplementary Table S1.** The average and error bar values in Figure 1

**Supplementary Table S2.** The average and error bar values in Figure 2

**Supplementary Table S3.** The average and error bar values in Figure 3

**Supplementary Table S4.** The average and error bar values in Figure 4

**Supplementary Table S5.** The average and error bar values in Figure 5

**Supplementary Table S6.** The average and error bar values in Figure 6

**Supplementary Table S7.** The average and error bar values in Figure 7

**Supplementary Table S8.** Primer sequences used in this study

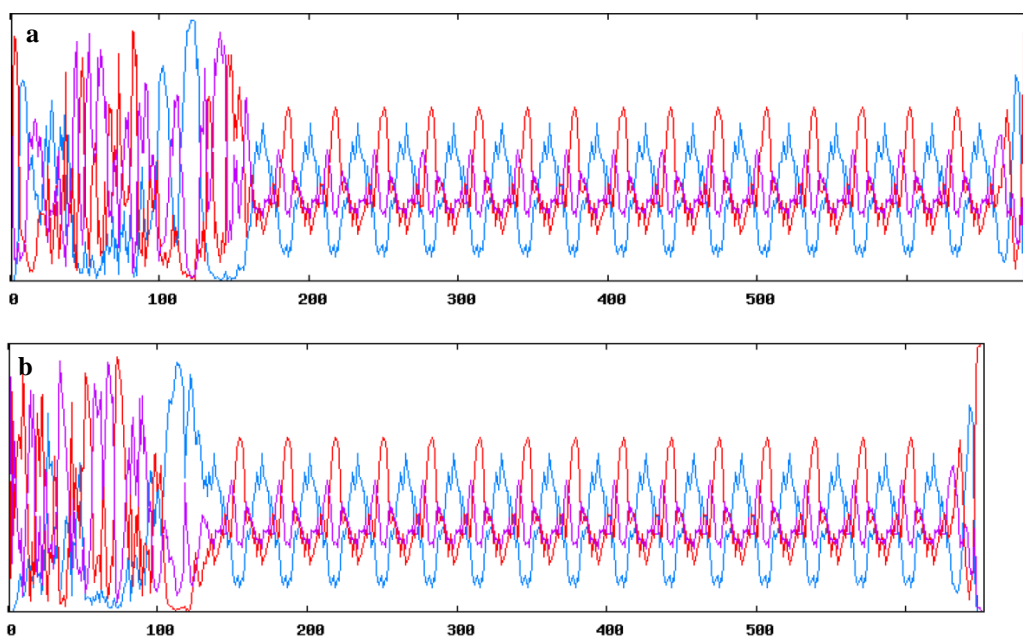

**Supplementary Figure S1.** Prediction of secondary structures of proteins encoded by two newly synthetic genes. **(a)** Structure of TKTKK1. **(b)** structure of TKTKK2. The secondary structures were predicted by submitting both protein sequences to the prediction database (<https://npsa-prabi.ibcp.fr/>; Trends Biochem Sci. 2000, 25: 147-150). In both **(a)** and **(b)**, blue, red and orange curves indicated alpha helix, extended strand and random coil structures, respectively.

**Supplementary Table S1.** The average and error bar values in Figure 1

| Tissues       | Average value in Figure 1b | Error bar in Figure 1b | Average value in Figure 1c | Error bar in Figure 1c |
|---------------|----------------------------|------------------------|----------------------------|------------------------|
| Leaf blade    | 5.55                       | 1.81                   | 65779.88                   | 1.81                   |
| Leaf sheath   | 8.34                       | 7.62                   | 110357.28                  | 7.62                   |
| Root          | 50.34                      | 45.95                  | 98709.58                   | 45.95                  |
| Stem          | 6.30                       | 2.77                   | 125638.06                  | 2.77                   |
| Inflorescence | 8.95                       | 3.80                   | 176092.00                  | 3.80                   |
| Anther        | 88.22                      | 12.63                  | 122933.98                  | 12.63                  |
| Pistil        | 57.25                      | 3.83                   | 148411.83                  | 3.83                   |
| Lemma, Palea  | 44.18                      | 4.32                   | 131738.25                  | 4.32                   |
| Ovary         | 30566.01                   | 3444.37                | 180516.80                  | 3444.37                |
| Embryo        | 10683.40                   | 1170.51                | 195853.20                  | 1170.51                |
| Endosperm     | 136598.20                  | 3109.17                | 158751.46                  | 3109.17                |

**Supplementary Table S2.** The average and error bar values in Figure 2

| Genotype | Average value in Figure 2b | Error bar in Figure 2b |
|----------|----------------------------|------------------------|
| WT       | 1.00                       | 0.04                   |
| Line 2   | 1.51                       | 0.07                   |
| Line 4   | 109.12                     | 12.81                  |
| Line 5   | 0.51                       | 0.05                   |
| Line 23  | 664.91                     | 112.82                 |
| Line 9   | 166.07                     | 20.14                  |
| Line 14  | 95.33                      | 12.17                  |
| Line 28  | 89.17                      | 12.34                  |
| Line 21  | 402.91                     | 104.34                 |
| Line 26  | 59.61                      | 3.31                   |
| Line 12  | 72.54                      | 5.72                   |
| Line 29  | 65.02                      | 4.94                   |
| Line 22  | 471.91                     | 1.48                   |
| Line 30  | 1.08                       | 0.12                   |
| Line 20  | 70.27                      | 19.09                  |
| Line 11  | 75.22                      | 9.48                   |
| Line 31  | 2.55                       | 0.63                   |
| Line 25  | 36.21                      | 3.42                   |
| Line 27  | 1.55                       | 0.08                   |

**Supplementary Table S3.** The average and error bar values in Figure 3

| Genotype | Average value in Figure 3 | Error bar in Figure 3 |
|----------|---------------------------|-----------------------|
| WT       | 1.00                      | 0.08                  |
| Line 1   | 1.52                      | 0.31                  |
| Line 2   | 5.01                      | 1.03                  |
| Line 3   | 2.64                      | 0.25                  |
| Line 4   | 2.57                      | 0.10                  |
| Line 5   | 2.71                      | 0.38                  |
| Line 6   | 5.13                      | 0.51                  |
| Line 7   | 3.53                      | 0.31                  |
| Line 8   | 2.57                      | 0.18                  |
| Line 9   | 7.81                      | 0.09                  |
| Line 10  | 3.88                      | 0.18                  |
| Line 11  | 1.14                      | 0.14                  |
| Line 12  | 6.35                      | 1.93                  |
| Line 13  | 10.64                     | 2.08                  |
| Line 14  | 6.50                      | 1.95                  |
| Line 15  | 8.76                      | 2.50                  |
| Line 16  | 4.20                      | 1.59                  |
| Line 18  | 4.64                      | 0.63                  |
| Line 19  | 6.83                      | 1.77                  |
| Line 20  | 15.35                     | 8.45                  |
| Line 21  | 16.37                     | 6.04                  |
| Line 22  | 17.52                     | 5.37                  |
| Line 23  | 3.09                      | 0.87                  |
| Line 24  | 3.47                      | 1.19                  |
| Line 25  | 12.02                     | 2.93                  |
| Line 26  | 6.31                      | 1.20                  |
| Line 27  | 9.20                      | 3.41                  |
| Line 28  | 5.51                      | 1.25                  |
| Line 29  | 6.66                      | 1.34                  |
| Line 30  | 6.84                      | 2.59                  |
| Line 31  | 13.06                     | 3.85                  |
| Line 32  | 5.67                      | 1.74                  |
| Line 33  | 6.95                      | 1.94                  |
| Line 34  | 4.87                      | 1.59                  |
| Line 36  | 6.11                      | 1.15                  |
| Line 37  | 7.27                      | 1.66                  |
| Line 38  | 4.66                      | 1.86                  |
| Line 39  | 4.96                      | 1.43                  |
| Line 41  | 4.45                      | 1.17                  |
| Line 42  | 5.73                      | 1.55                  |
| Line 43  | 15.57                     | 5.58                  |
| Line 44  | 8.33                      | 2.96                  |
| Line 45  | 11.44                     | 2.84                  |
| Line 46  | 11.74                     | 5.25                  |
| Line 47  | 5.92                      | 1.77                  |
| Line 48  | 7.25                      | 2.26                  |
| Line 49  | 8.37                      | 2.68                  |
| Line 50  | 6.22                      | 2.09                  |
| Line 51  | 6.58                      | 2.50                  |
| Line 52  | 4.05                      | 1.13                  |
| Line 53  | 6.43                      | 1.92                  |
| Line 54  | 10.83                     | 2.80                  |
| Line 55  | 2.29                      | 0.64                  |
| Line 56  | 3.45                      | 0.91                  |
| Line 58  | 3.17                      | 0.89                  |
| Line 59  | 3.65                      | 0.94                  |
| Line 60  | 2.36                      | 0.67                  |
| Line 61  | 17.36                     | 4.81                  |
| Line 62  | 5.19                      | 1.41                  |
| Line 63  | 4.91                      | 1.30                  |
| Line 64  | 6.75                      | 1.62                  |

**Supplementary Table S4.** The average and error bar values in Figure 4

| Genotype | Average value in Figure 4a | Error bar in Figure 4a | Average value in Figure 4b | Error bar in Figure 4b |
|----------|----------------------------|------------------------|----------------------------|------------------------|
| WT       | 1.00                       | 0.03                   | 1.00                       | 0.08                   |
| Line1    | 5.54                       | 0.39                   | 3.29                       | 0.20                   |
| Line2    | 22.92                      | 9.53                   | 8.14                       | 2.96                   |
| Line3    | 3.02                       | 0.40                   | 2.80                       | 0.32                   |
| Line5    | 11.80                      | 0.64                   | 4.31                       | 0.91                   |
| Line6    | 7.96                       | 0.50                   | 5.68                       | 1.93                   |
| Line7    | 4.63                       | 0.91                   | 3.24                       | 0.56                   |
| Line8    | 8.44                       | 1.10                   | 3.33                       | 1.19                   |
| Line9    | 6.51                       | 1.96                   | 3.08                       | 0.58                   |
| Line10   | 11.68                      | 1.79                   | 2.37                       | 0.81                   |
| Line11   | 3.54                       | 0.18                   | 2.68                       | 0.42                   |
| Line12   | 5.14                       | 0.37                   | 2.71                       | 0.53                   |
| Line13   | 4.36                       | 0.21                   | 3.51                       | 0.25                   |
| Line14   | 2.56                       | 0.63                   | 2.05                       | 0.55                   |
| Line15   | 7.62                       | 0.65                   | 3.73                       | 0.56                   |
| Line16   | 4.97                       | 0.27                   | 3.18                       | 0.48                   |
| Line17   | 11.59                      | 0.26                   | 2.59                       | 0.24                   |
| Line18   | 4.50                       | 0.25                   | 5.23                       | 0.34                   |
| Line19   | 3.09                       | 0.14                   | 3.04                       | 0.41                   |
| Line20   | 2.88                       | 0.32                   | 4.80                       | 0.39                   |
| Line21   | 3.18                       | 0.60                   | 1.84                       | 0.16                   |
| Line22   | 3.57                       | 0.18                   | 1.58                       | 0.13                   |
| Line23   | 5.53                       | 1.16                   | 3.19                       | 0.87                   |
| Line24   | 8.33                       | 0.87                   | 3.67                       | 0.46                   |
| Line25   | 11.68                      | 0.80                   | 6.20                       | 0.51                   |
| Line26   | 3.56                       | 0.79                   | 1.69                       | 0.18                   |
| Line27   | 1.29                       | 0.56                   | 0.71                       | 0.05                   |
| Line28   | 4.50                       | 1.87                   | 2.53                       | 0.14                   |
| Line30   | 6.66                       | 0.11                   | 6.40                       | 0.29                   |
| Line32   | 5.31                       | 0.38                   | 1.01                       | 0.04                   |
| Line33   | 13.86                      | 0.80                   | 6.92                       | 1.22                   |
| Line34   | 4.92                       | 0.36                   | 3.05                       | 0.16                   |
| Line35   | 54.45                      | 38.08                  | 27.88                      | 19.88                  |
| Line36   | 6.46                       | 0.73                   | 4.67                       | 0.33                   |
| Line37   | 7.05                       | 2.15                   | 2.50                       | 0.26                   |
| Line38   | 1.34                       | 0.06                   | 2.11                       | 0.13                   |
| Line41   | 17.25                      | 2.70                   | 7.91                       | 1.87                   |
| Line42   | 7.75                       | 1.53                   | 4.09                       | 1.23                   |
| Line43   | 10.28                      | 1.86                   | 3.00                       | 1.01                   |
| Line44   | 7.99                       | 1.07                   | 3.28                       | 1.09                   |
| Line45   | 6.55                       | 1.52                   | 2.38                       | 0.68                   |
| Line46   | 6.04                       | 0.21                   | 3.11                       | 0.49                   |
| Line47   | 4.20                       | 0.56                   | 2.52                       | 0.49                   |
| Line48   | 6.68                       | 0.70                   | 4.65                       | 0.94                   |
| Line49   | 5.26                       | 2.40                   | 2.93                       | 1.16                   |
| Line50   | 2.84                       | 0.33                   | 2.27                       | 0.49                   |
| Line51   | 19.60                      | 3.09                   | 3.58                       | 0.54                   |
| Line52   | 2.90                       | 0.31                   | 1.47                       | 0.27                   |
| Line53   | 23.37                      | 10.45                  | 3.17                       | 0.73                   |
| Line54   | 7.78                       | 0.89                   | 2.69                       | 0.55                   |
| Line55   | 14.26                      | 1.54                   | 3.26                       | 0.71                   |
| Line56   | 8.51                       | 0.90                   | 2.90                       | 0.59                   |
| Line57   | 5.84                       | 0.92                   | 1.88                       | 0.55                   |
| Line58   | 7.62                       | 1.00                   | 2.98                       | 0.64                   |
| Line59   | 6.97                       | 0.57                   | 2.78                       | 0.57                   |
| Line60   | 18.14                      | 1.51                   | 7.68                       | 1.36                   |

**Supplementary Table S5.** The average and error bar values in Figure 5

| Genotype | Average value in Figure 5a | Error bar in Figure 5a | Average value in Figure 5b | Error bar in Figure 5b |
|----------|----------------------------|------------------------|----------------------------|------------------------|
| WT       | 0.26                       | 0.01                   | 3.03                       | 0.04                   |
| Line 9   | 0.38                       | 0.02                   | 3.85                       | 0.09                   |
| Line 23  | 0.36                       | 0.01                   | 3.8                        | 0.07                   |

**Supplementary Table S6.** The average and error bar values in Figure 6

| Figure panel | Genotype | Average | Error bar value |
|--------------|----------|---------|-----------------|
| Figure 6a    | WT       | 1.00    | 0.12            |
|              | Line 9   | 3.69    | 0.43            |
|              | Line 14  | 6.59    | 0.88            |
|              | Line 21  | 5.22    | 0.35            |
|              | Line 46  | 3.38    | 0.05            |
|              | Line 5   | 0.90    | 0.11            |
| Figure 6b    | WT       | 0.31    | 0.02            |
|              | Line 9   | 0.42    | 0.03            |
|              | Line 14  | 0.36    | 0.03            |
|              | Line 21  | 0.40    | 0.02            |
|              | Line 46  | 0.33    | 0.01            |
|              | Line 5   | 0.34    | 0.03            |
| Figure 6c    | WT       | 0.33    | 0.02            |
|              | Line 9   | 0.39    | 0.01            |
|              | Line 14  | 0.37    | 0.02            |
|              | Line 21  | 0.40    | 0.01            |
|              | Line 46  | 0.38    | 0.01            |
|              | Line 5   | 0.36    | 0.01            |
| Figure 6d    | WT       | 9.01    | 0.43            |
|              | Line 9   | 10.55   | 0.22            |
|              | Line 14  | 10.11   | 0.45            |
|              | Line 21  | 10.76   | 0.25            |
|              | Line 46  | 10.27   | 0.29            |
|              | Line 5   | 9.85    | 0.37            |
| Figure 6e    | WT       | 10.17   | 0.49            |
|              | Line 9   | 12.25   | 0.12            |
|              | Line 14  | 11.80   | 0.42            |
|              | Line 21  | 12.25   | 0.12            |
|              | Line 46  | 11.40   | 0.38            |
|              | Line 5   | 11.10   | 0.33            |



**Supplementary Table S7.** The average and error bar values in Figure 7

| Figure panel | Genotype    | Plant height             | Error bar value |
|--------------|-------------|--------------------------|-----------------|
| Figure 7c    | WT          | 78.52                    | 0.54            |
|              | Line 9      | 72.35                    | 0.78            |
|              | Line 14     | 73.18                    | 4.78            |
|              | Line 21     | 73.58                    | 2.47            |
|              | Line 46     | 59.65                    | 0.07            |
|              | Line 5      | 82.78333333              | 1.24922198      |
| Figure 7d    | Genotype    | Tiller numbers per plant | Error bar value |
|              | WT          | 8.377777778              | 3.253943476     |
|              | Line 9      | 11.23450292              | 6.32570672      |
|              | Line 14     | 14.11190476              | 4.725675875     |
|              | Line 21     | 10.77318008              | 2.103639629     |
|              | Line 46     | 11.11111111              | 5.807785324     |
| Line 5       | 9.727969349 | 5.032348434              |                 |
| Figure 7e    | Genotype    | Seeding rate             | Error bar value |
|              | WT          | 66.11914446              | 6.400996472     |
|              | Line 9      | 30.53737923              | 9.580879196     |
|              | Line 14     | 33.19147688              | 5.170506337     |
|              | Line 21     | 49.80914633              | 6.289409637     |
|              | Line 46     | 47.35363428              | 3.067690795     |
| Line 5       | 52.71515646 | 8.825728219              |                 |
| Figure 7f    | Genotype    | Grain yield per plant    | Error bar value |
|              | WT          | 3.914444444              | 1.43989727      |
|              | Line 9      | 1.744532164              | 0.413932342     |
|              | Line 14     | 2.633531746              | 0.721604522     |
|              | Line 21     | 3.229632184              | 0.21457196      |
|              | Line 46     | 2.517111111              | 2.09353994      |
| Line 5       | 3.548291188 | 1.160821955              |                 |

**Supplementary Table S8: Primer sequences used in this study**

| Primer Name           | Forward primer               | Reverse primer               | Length (bp) |
|-----------------------|------------------------------|------------------------------|-------------|
| <i>HPT</i>            | CAACCAAGCTCTGATAGAGT         | GAAGAATCTCGTGCTTTCAG         | 745         |
| <i>LOC_Os12g16880</i> | ATGAAGATCATTCTTCTTTGCTCTCC   | ggatccGTACCAGATACCACCGACCGTG | 474         |
| <i>LOC_Os08g03579</i> | ATGTCTTCGGCTGCCAAGCTCG       | ggatccACGGTAGGTAAACATTAGCAGC | 204         |
| <i>eEF-1a</i>         | TTTCACTCTTGGTGTGAAGCAGAT     | GACTTCCTTCACGATTTCATCGTAA    | 103         |
| <i>TKTKKF</i>         | ggatccACCAAGACGAAGAAGACGAAGA | -                            | -           |
| <i>TKTKKR</i>         | agatctCGTCTTCGTCTTGGTCTTCTTC | -                            | -           |
| <i>T-DNA LBR</i>      | CGAATTAATTCGGCGTTAATTCAGTAC  | -                            | -           |
| <i>T-DNA RBF</i>      | GCAGCCTGAATGGCGAATGCTAGAG    | -                            | -           |
| <i>35S::TKTKK1-14</i> | GATTCTGTGTTGTTCTTTCCAAC      | GATCAATCAAAGTCAACTGTTCTG     | 1152        |
| <i>35S::TKTKK1-21</i> | GCTTCACGAGAAAAGAACGTGAC      | GTAAGACGCGAGGTTATACGTAC      | 1017        |
| <i>35S::TKTKK2-46</i> | GAAAGGCAGAGAAAGGGAGAGAG      | CAAATTATTTGATTTCCCAACAACCTTG | 936         |
| <i>35S::TKTKK3-5</i>  | GTACGTAACTATTACTAAGAACCG     | GGCTTGAAGTGTTTTCACTAAATC     | 988         |
